# Supplementary material for: Effects of crab shell extract as a coagulant on the textural and sensorial properties of tofu (soybean curd)
Source: PubMed Central journal article supplement (PMC6392879; doi:10.1002/fsn3.837), 2019-01-27
Supplement: FSN3-7-547-s001.pdf [file FSN3-7-547-s001.pdf]

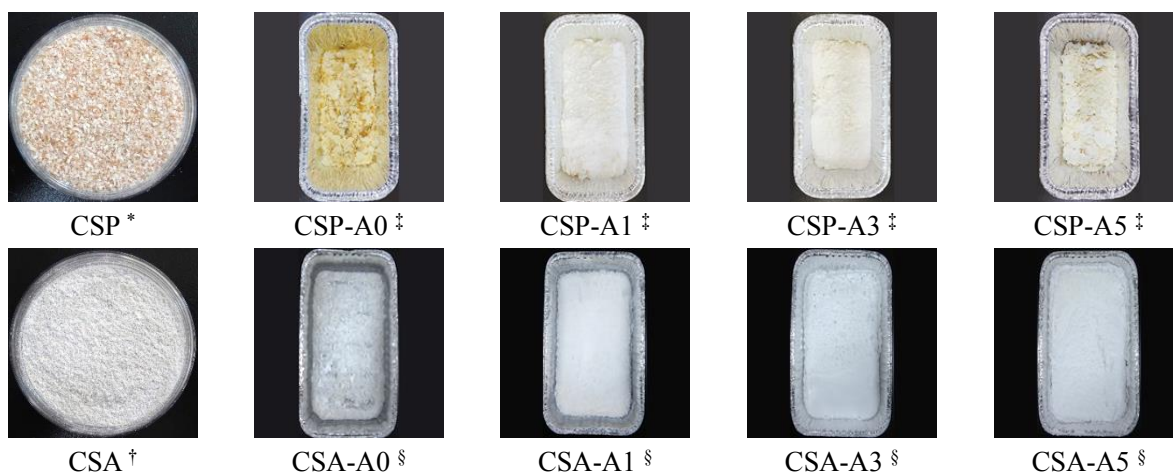

(A) Crab shell powder, ash, and their extracts with 0 to 5 % acetic acid

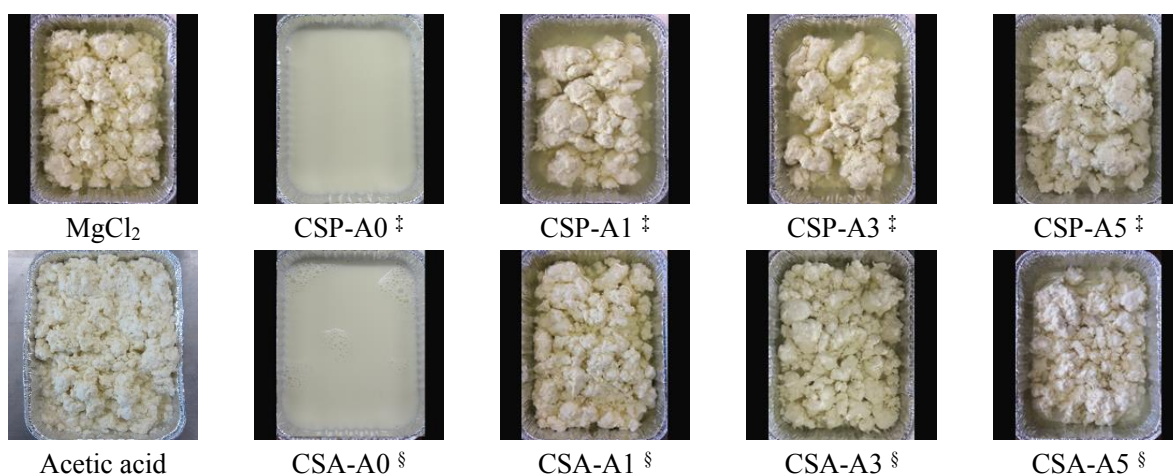

(B) The tofu samples coagulated with the crab shell extracts

**Supplementary Fig. 1.** Photography of the tofu samples coagulated with the crab shell extracts

\*Crab shell powder      †Crab shell ash      ‡The extracts from CSP with 0-5 % acetic acid

§The extracts from CSA with 0-5 % acetic acid
